# Supplementary material
Source: Springer Nature journal article supplement (https://www.springermedizin.de/resource/supplementary/12889_2013_5832_MOESM3_ESM.pdf/9496244)
Supplement: MOESM3 [file 9496244]

| Brochure \ Criterion                              | A      | B     | C | D      | E      | F | G      | H     | I     | J | K      | L      | M      |
|---------------------------------------------------|--------|-------|---|--------|--------|---|--------|-------|-------|---|--------|--------|--------|
| Common risks are stated                           | Green  | Red   |   | Red    |        |   |        | Green |       |   | Yellow | Yellow | Yellow |
| Risk of pain is stated                            | Yellow | Red   |   |        |        |   | Yellow | Green | Green |   | Yellow | Yellow | Yellow |
| Risk of cardiovascular symptoms is stated         |        |       |   |        |        |   |        |       |       |   | Yellow |        |        |
| Risk of nausea is stated                          |        |       |   |        |        |   |        |       |       |   |        |        |        |
| Risk of bleeding is stated                        |        |       |   | Yellow | Green  |   |        |       |       |   | Red    |        | Red    |
| Risk of infections is stated                      |        | Green |   |        |        |   |        |       |       |   |        |        | Yellow |
| Risk of perforation is stated                     |        |       |   |        | Green  |   |        |       |       |   | Yellow |        | Red    |
| Risk of death is stated                           |        |       |   |        | Yellow |   |        |       |       |   | Green  |        |        |
| Problem of overdiagnosis is stated                |        |       |   |        |        |   |        |       |       |   |        |        |        |
| Frequency of overdiagnosis is stated              |        |       |   |        |        |   |        |       |       |   |        |        |        |
| Possible consequences of overdiagnosis are stated |        |       |   |        |        |   |        |       |       |   |        |        |        |

correctly reported
  reported, but unclear  
 incorrectly reported
  not reported.
